1 **Cross-species evolutionary rewiring in the enteric bacterium**  
2 ***Campylobacter***

3  
4 Aidan J. Taylor<sup>1</sup>§, Guillaume Méric<sup>2</sup>†§, Koji Yahara<sup>3</sup>, Ben Pascoe<sup>2</sup>, Leonardos Mageiros<sup>2,4</sup>,  
5 Evangelos Mourkas<sup>2</sup>, Jessica K Calland<sup>2</sup>, Santeri Puranen<sup>5</sup>, Matthew D. Hitchings<sup>6</sup>, Sion  
6 Bayliss<sup>2</sup>, Keith A. Jolley<sup>7</sup>, Carolin M. Kobras<sup>1</sup>, Nicola J. Williams<sup>8</sup>, Arnoud H. M. van Vliet<sup>9</sup>,  
7 Julian Parkhill<sup>10</sup>, Martin C. J. Maiden<sup>7</sup>, Jukka Corander<sup>5,11,12</sup>, Daniel Falush<sup>13</sup>, Xavier  
8 Didelot<sup>14</sup>, David J. Kelly<sup>1\*</sup>, Samuel K. Sheppard<sup>2,7\*</sup>

9  
10  
11 <sup>1</sup>Department of Molecular Biology and Biotechnology, The University of Sheffield, Sheffield S10  
12 2TN, United Kingdom;

13 <sup>2</sup>The Milner Centre for Evolution, Department of Biology and Biochemistry, University of Bath, Bath  
14 BA2 7AY, UK;

15 <sup>3</sup>Antimicrobial Resistance Research Centre, National Institute of Infectious Diseases, Tokyo, Japan;

16 <sup>4</sup>Department of Infectious Diseases, Central Clinical School, Monash University, Melbourne, Victoria  
17 3004, Australia;

18 <sup>5</sup>Department of Mathematics and Statistics, Helsinki Institute for Information Technology, University  
19 of Helsinki, Helsinki, Finland;

20 <sup>6</sup>Swansea University Medical School, Institute of Life Science, Swansea SA2 8PP, UK;

21 <sup>7</sup>Department of Zoology, University of Oxford, South Parks Road, Oxford OX1 3PS, UK;

22 <sup>8</sup>Department of Epidemiology and Population Health, Institute of Infection & Global Health,  
23 University of Liverpool, Leahurst Campus, Wirral, UK;

24 <sup>9</sup>School of Veterinary Medicine, University of Surrey, Guildford GU2 7AL, UK;

25 <sup>10</sup>Department of Veterinary Medicine, University of Cambridge, Madingley Rd, Cambridge CB3 0ES,  
26 UK;

27 <sup>11</sup>Department of Biostatistics, University of Oslo, Oslo, Norway;

28 <sup>12</sup>Parasites and Microbes, Wellcome Sanger Institute, Cambridge, UK;

29 <sup>13</sup>The Centre for Microbes, Development and Health, Institut Pasteur of Shanghai, Shanghai, China;

30 <sup>14</sup>School of Life Sciences and Department of Statistics, University of Warwick, Coventry CV4 7AL,  
31 UK.

32  
33  
34 \*Corresponding author(s): David J. Kelly, [d.kelly@sheffield.ac.uk](mailto:d.kelly@sheffield.ac.uk); Samuel K. Sheppard,  
35 [s.k.sheppard@bath.ac.uk](mailto:s.k.sheppard@bath.ac.uk);

36 †Present address: Cambridge Baker Systems Genomics Initiative, Baker Heart and Diabetes Institute,  
37 75 Commercial Rd, Melbourne 3004, Victoria, Australia.

38  
39 § Contributed equally.

40  
41 Keywords: comparative genomics, introgression, admixture, epistasis, evolution, *Campylobacter*,  
42 microbiology

43  
44 Running title: Epistasis and recombination in *Campylobacter*  
45  
46

47 **Abstract**

48

49 The lateral transfer of genes among bacterial strains and species has opposing effects,  
50 conferring potentially beneficial adaptations whilst introducing disharmony in coadapted  
51 genomes. The prevailing outcome will depend upon the fitness cost of disrupting established  
52 epistatic interactions between genes. It is challenging to understand this in nature because it  
53 requires population-scale analysis of recombination and genomic coadaptation, and  
54 laboratory confirmation of the functional significance of genotype variation. By assigning the  
55 ancestry of DNA in the genomes of two species of the world's most common enteric bacterial  
56 pathogen, we show that up to 28% of the *Campylobacter coli* genome has been recently  
57 introgressed from *Campylobacter jejuni*. Then, by quantifying covariation across the genome  
58 we show that >83% of putative epistatic links are between introgressed *C. jejuni* genes in  
59 divergent genomic positions (>20kb apart), consistent with independent acquisition. Much of  
60 this covariation is between 16 genes, with just 5 genes accounting for 99% of epistatic SNP  
61 pairs. Laboratory mutagenesis and complementation cloning assays demonstrated functional  
62 links between these genes, specifically related to formate dehydrogenase (FDH) activity.  
63 These findings suggest that the genetic confederations that define genomic species may be  
64 transient. Even for complex traits such as central metabolism in the bacterial cell, conditions  
65 can arise where epistatic genes can be decoupled, transferred and reinstated in a new genetic  
66 background.

67

68

## 69 Introduction

70

71 Complex biological life is made possible by the interaction of genes. In bacteria, a vast array  
72 of genes, found together in almost infinite combinations, has allowed colonization of virtually  
73 every conceivable habitat on earth. While mutation remains the engine of genetic novelty, for  
74 most bacteria adaptation also involves the acquisition of genes from other strains and species  
75 through horizontal gene transfer (HGT)<sup>1</sup> potentially conferring new phenotypes to future  
76 generations. In some well documented cases, a single nucleotide substitution or acquisition of  
77 a small number of genes, can prompt new evolutionary trajectories with striking outcomes  
78 such as the emergence of virulent or antibiotic resistant strains<sup>2</sup>. With such dynamic genomic  
79 architecture, it may be tempting (and possibly useful<sup>3</sup>) to consider genes as independent units  
80 that ‘plug and play’ innovation into recipient genomes. This is clearly an oversimplification.  
81 In fact, genomes are highly interactive wherein the effect of one gene depends on another  
82 (epistasis). Therefore, it is likely that some introduced changes will disrupt gene networks  
83 and be costly to the original coadapted genetic background, particularly for complex  
84 phenotype innovation involving multiple genes.

85

86 Understanding how epistasis influences the evolution of phenotype diversity has preoccupied  
87 researchers since the origin of population genetics<sup>4-10</sup>, with much emphasis placed upon the  
88 relative amounts of recombination and epistatic effect sizes<sup>11,12</sup>. In sexual populations, such  
89 as outbreeding metazoans, genetic variation is shuffled at each generation so genes can only  
90 rise in frequency if they have high mean fitness across genetic backgrounds. This means that  
91 it is unlikely that multiple distinct epistatic allele combinations will be maintained in the  
92 same population and barriers to gene flow, such as geographic isolation, may be required for  
93 marked phenotypic diversification<sup>8</sup>. In bacteria, however, rapid clonal reproduction allows  
94 multiple independent beneficial allele pairs to rise to high frequency in a single population.  
95 For example, in common enteric bacteria such as *Escherichia coli*, *Salmonella enterica* and  
96 *Campylobacter jejuni* the doubling time in the wild has been estimated at around 24 hours or  
97 less<sup>13,14</sup>. Therefore, though HGT occurs in these organisms<sup>15</sup>, even in highly recombinogenic  
98 *C. jejuni*<sup>13,16</sup>, there will likely be many millions of bacterial generations between  
99 recombination events at a given locus. This allows mutations that are beneficial only in  
100 specific genetic backgrounds to establish in a single population and linkage disequilibrium to  
101 form between different epistatic pairs<sup>17</sup>.

102

103 In this coadapted genomic landscape, recombination presents something of a paradox. On the  
104 one hand, it promotes adaptation by conferring novel functionality on the recipient genome<sup>18</sup>  
105 and reduces competition between clones that carry different beneficial mutations (clonal  
106 interference), on the other it potentially introduces disharmonious genes or gene-  
107 combinations that will be discriminated against by selection<sup>19</sup>. Indeed, negative epistatic  
108 interactions between genes with different evolutionary histories have been proposed as a  
109 barrier to recombination<sup>4-10,20</sup>, particularly between species. However, interspecies  
110 recombination is common in bacteria<sup>18,21</sup>. One of the most conspicuous examples of this can  
111 be seen in the common animal gut bacterium *Campylobacter*, which is among the most  
112 prolific causes of human bacterial gastroenteritis worldwide<sup>22</sup>. Specifically, introgression  
113 between the two most important pathogenic species, *C. jejuni* and *C. coli*, has led to the  
114 emergence of a globally distributed ‘hybrid’ *C. coli* lineage<sup>23</sup> that is responsible for almost all  
115 livestock and human infections with this species.

116

117 This evolutionary scenario provides an ideal context for addressing the paradox of  
118 recombination in coadapted genomes. First, because up to 23% of the core genome of

119 common *C. coli* has been recently introgressed from *C. jejuni*<sup>24</sup>, potentially disrupting  
120 epistatic interactions. Second, because *C. jejuni* and *C. coli* have undergone an extended  
121 period of independent evolution (85% average nucleotide identity), therefore recombined  
122 sequence is conspicuous in the genome. Third, because the outcompetition of ancestral strains  
123 by introgressed *C. coli* is inconsistent with traditional assumptions of selection against hybrid  
124 lineages.

125

126 Here, we analyse the genomes of isolates representing known diversity within *C. jejuni* and  
127 *C. coli* and perform chromosome painting analysis to assign ancestry across the genomes of  
128 introgressed *C. coli*. We then perform a systematic screen for long-range covariation in the  
129 core genome to identify SNPs that are in strong linkage disequilibrium in independent genetic  
130 backgrounds and, therefore, are not explained by the clonal frame of the population. Finally,  
131 we investigate the function of covarying genes that account for most of the interactions and  
132 confirm epistasis among coadapted genes. By combining these analyses, we demonstrate how  
133 multiple interacting genes from one species can transfer to another, modifying the co-adapted  
134 genomic landscape of the recipient and promote a natural admixture-mediated genetic  
135 revolution<sup>19,25</sup>.

136

137

## 138 **Results**

139

### 140 ***Campylobacter* populations are highly structured with intermediate sequence clusters**

141 Pan-genome analysis identified the presence and variation of every automatically annotated  
142 gene from every genome. This revealed a core genome of 631 gene orthologues in all  
143 *Campylobacter* isolates in this study. There were 1287 genes common to all *C. jejuni* isolates  
144 and 895, 1021 and 1272 common to *C. coli* clades 1, 2 and 3, respectively. Consistent with  
145 previous studies<sup>24</sup>, neighbour-joining and ClonalFrameML trees based on genes within  
146 concatenated core genome alignments revealed population structure in which *C. jejuni* and *C.*  
147 *coli* clade 2 and 3 isolates each formed discrete clusters (Figure 1A, Supplementary Figure 1).  
148 Isolates designated as *C. coli* clade 1 were found in three clusters on the phylogeny:  
149 unintrogressed ancestral strains, and the ST-828 and ST-1150 clonal complexes which  
150 account for the great majority of strains found in agriculture and human disease<sup>24</sup>. Pan-  
151 genome analysis quantified the increase in unique gene discovery as the number of sampled  
152 genomes increased (Figure 1B). For all sequence clusters there was evidence of an open pan-  
153 genome with a trend towards continued rapid gene discovery within sequence clusters with  
154 fewer isolates. There was considerable accessory genome variation between species and  
155 clades, potentially associated with important adaptive traits (Supplementary Figure 2) and  
156 there was evidence that the average number of genes per genome was greater in *C. coli* ST-  
157 828 complex isolates than in *C. jejuni* (Figure 1C).

158

### 159 **There is substantial introgression within the *C. coli* core genome**

160 The large genetic distances among *C. coli* clade 1 isolates (Figure 1A), have been shown to  
161 be a consequence of the import of DNA from *C. jejuni* rather than accumulation of mutations  
162 during a prolonged period of separate evolution<sup>23</sup>. Using chromosome painting to infer the  
163 coancestry of core-genome haplotype data from CC-828 and CC-1150 isolates gave a  
164 detailed representation of the recombination-derived chunks from each *C. jejuni* donor group  
165 to each recipient individual (Supplementary Figure 3). The majority of introgressed SNPs  
166 were rare, occurring in fewer than 50 recipient genomes (Figure 2A). However, a large  
167 proportion of the introgressed *C. coli* clade 1 genomes contained DNA of *C. jejuni* ancestry  
168 in >98% of recipient isolates. Consistent with previous estimates<sup>24</sup>, these regions where

169 introgressed DNA was largely fixed within the *C. coli* population, occurred across the  
170 genome and comprised up to 15% and 28% of the CC-828 and CC-1150 isolate genomes  
171 respectively (Figure 2A). When considering donor groups, the majority of introgressed DNA  
172 in *C. coli* involves genes that are present in multiple *C. jejuni* lineages (core genes) (Figure  
173 2B).

174

175 Having identified *C. jejuni* ancestry within *C. coli* genomes, we investigated the sequence of  
176 events responsible for introgression. Most introgressed SNPs are found at low frequency in  
177 both clonal complexes. However, there was evidence of SNPs that are introgressed in both  
178 complexes as well as high frequency lineage specific introgression in both CC-828 and CC-  
179 1150 (Figure 2C). Specifically, 25% of the *C. jejuni* DNA found in >98% of CC-828 isolates  
180 was also found in CC-1150 (Figure 2D), implying that this genetic material was imported by  
181 the common ancestor(s) of both complexes. Subsequent to the divergence of these two  
182 complexes, introgression continued with nearly 75% of *C. jejuni* DNA present in one  
183 recipient clonal complex and not the other. This is consistent with an evolutionary history in  
184 which there was a period of progressive species and clade divergence reaching approximately  
185 12% at the nucleotide level between *C. jejuni* and *C. coli* and around 4% between the  
186 three *C. coli* lineages. More recently, changes to the patterns of gene flow led one  
187 *C. coli* clade 1 lineage to import substantial quantities of *C. jejuni* DNA, and further lineage-  
188 specific introgression gave rise to two clonal complexes (CC-828 and CC-1150) that  
189 continued to accumulate *C. jejuni* DNA, independently creating the population structure  
190 observed today (Figure 2E).

191

192 The high magnitude introgression into *C. coli* clade 1 isolates has introduced thousands of  
193 nucleotide changes to the core genome. However, divergence in bacteria may be uneven  
194 across the genome. First, because recombination is more likely to occur in regions where  
195 donor and recipient genomes have high nucleotide similarity<sup>21,26,27</sup>. Second, because of  
196 ‘fragmented speciation’<sup>28</sup>, in which gene flow varies in different parts of the genome, such as  
197 regions responsible for adaptive divergence, leading to phylogenetic incongruence among  
198 genes. Consistent with previous estimates<sup>24</sup>, we found that the three *C. coli* clades had similar  
199 high divergence with *C. jejuni* across the genome, ranging from 68% to 98% nucleotide  
200 identity for individual genes (Figure 2F), implying a period of divergence with low levels of  
201 gene flow. We found no evidence that high genetic differentiation between the species  
202 prevented recombination. While there was some evidence that more recombination occurred  
203 in regions of low nucleotide divergence (between unintegrated *C. coli* clade 1 and *C.*  
204 *jejuni*), introgression occurred across the genome at sites with varying levels of nucleotide  
205 identity (Figure 2F). This level of recombination has greatly increased overall genetic  
206 diversity across the genome in *C. coli* clade 1 and introduced changes that have potential  
207 functional significance.

208

### 209 **Much of the putative epistasis occurs between SNPs in introgressed genes**

210 ClonalFrameML analysis revealed the importance of homologous recombination in  
211 generating sequence variation within the introgressed *C. coli*. Estimates of the relative  
212 frequency of recombination versus mutation ( $R/\theta=0.43$ ), mean recombination event length  
213 ( $\delta=152\text{bp}$ ) and average amount of polymorphism per site in recombined fragments ( $v=0.07$ ),  
214 imply that recombination has had an effect ( $r/m$ ) 4.57 times higher than *de novo* mutation  
215 during the diversification of CC-828. This is consistent with previous analysis and confirmed  
216 recombination as the major driver of molecular evolution in *C. coli*<sup>13,24,29</sup>. The continuous  
217 time Markov chain model for the joint evolution of pairs of biallelic sites on a phylogenetic  
218 tree (Supplementary Figure 4) was applied to investigate patterns of covariance for all pairs



219 of sites >20kb apart (Figure 3A). For most biallelic sites there were few branches on the tree  
220 where substitutions occurred, so that their evolution is compatible with separate evolution on  
221 the same clonal frame. However, 2874 covarying pairs evolved more frequently together than  
222 would be expected ( $p$ -value  $10^{-8}$ ) if they had evolved independently based on the tree, and  
223 hence indicated patterns of putative epistasis.

224

225 Among them, the location of 2618 putative epistatic pairs of sites was compared to the  
226 inferred ancestry (unintrogresed *C. coli* or *C. jejuni*) of sequence across the genome of CC-  
227 828 and CC-1150 *C. coli* strains (Figure 3B, Supplementary Data 1). For each epistatic pair,  
228 the major and minor haplotype were defined if there was haplotype polymorphism between  
229 *C. jejuni* and CC-828 and CC-1150 *C. coli*. This allowed quantification of the number of  
230 covarying sites that occurred between an ancestral *C. coli* (unintrogresed) and an  
231 introgressed *C. jejuni* allele, two introgressed alleles, and sites that do not segregate by  
232 species. Strikingly, the breakdown of the major and minor haplotype combinations among the  
233 2618 epistatic pairs (Figure 3C, Source Data) shows the major haplotype for 83.5% of  
234 putative epistatic SNP pairs was *C. jejuni* indicating that both co-varying sites had *C. jejuni*  
235 ancestry, consistent with epistasis between introgressed ancestral *C. jejuni* sequence at  
236 divergent genomic positions. Investigation of the genes containing co-varying sites revealed  
237 that 2187 SNP pairs were in 16 genes with just five genes accounting for 99.1% of them  
238 (Figure 3D, Supplementary Data 2, Supplementary Figure 5).

239

#### 240 **Genomic context and physiological role of epistatically linked genes**

241 The five genes accounting for the majority of epistatic interactions (*cj1167*, *cj1168c*,  
242 *cj1171c/ppi*, *cj1507c/modE* and *cj1508c/fdhD*) were investigated for their physiological role  
243 in *C. jejuni*. FdhD and ModE are proteins involved in the biogenesis of formate  
244 dehydrogenase (FDH). The FDH complex (FdhABC) oxidises formate to bicarbonate to  
245 generate electrons that fuel cellular respiration. Formate is an abundant electron donor  
246 produced by host microbiota and an important energy source for *Campylobacter in vivo*<sup>30,31</sup>.  
247 The remaining three genes, *cj1167* (annotated incorrectly as *ldh*, lactate dehydrogenase),  
248 *cj1168c* and *cj1171c (ppi)* are also grouped together on the genome, where *cj1167* and  
249 *cj1168c* are adjacent but with the open reading frames (ORFs) convergent and overlapping,  
250 while *ppi* is upstream, separated by two non-epistatically linked genes (*cj1169c* and *cj1170c*,  
251 Figure 4A). Considering the genomic arrangement, it is therefore clear that the putative  
252 epistatic links uncovered in this study essentially occur across two loci in the genome  
253 (*fdhD/modE* and *cj1167/cj1168c/ppi*), with each of the latter three genes linked with both  
254 *fdhD* and *modE* (Figure 4A). Given the known function of *fdhD* and *modE* in biogenesis of  
255 the FDH complex, we hypothesised that *cj1167/cj1168c/ppi* might also have some role in  
256 FDH biogenesis or activity in order to form a functional epistatic connection. We therefore  
257 constructed deletion mutants to investigate the possible role of these genes in FDH activity.

258

259 Initially, each of the mutants and their parental wildtype (*C. jejuni* NCTC11168) were grown  
260 in rich media (Muller-Hinton broth) and their formate dependent oxygen consumption rates  
261 determined (Figure 4B). *cj1167*, *cj1168c* and *ppi* mutants demonstrated wildtype levels of  
262 FDH activity, while activity in both *fdhD* and *modE* mutants was abolished. In order to  
263 confirm that the phenotype of the *fdhD* and *modE* mutants was not due to a polar effect on the  
264 surrounding *fdh* locus, these mutants were genetically complemented by reintroduction of a  
265 second copy of the wildtype gene into the rRNA locus, which restored near wildtype levels of  
266 FDH activity in both cases (Figure 4B).

267

268 As neither *cj1167*, *cj1168c* or *ppi* mutants showed altered FDH activity in cells grown in rich  
269 media, we considered that their function may be related to an FDH-specific nutrient  
270 requirement as would likely be found *in vivo*. Since the formate oxidising subunit of FDH,  
271 FdhA, specifically requires a molybdo- or tungsto-pterin (Mo/W) cofactor and a  
272 selenocysteine (SeC) residue for catalysis<sup>32</sup>, Mo, W or Se supply presented possible targets.  
273 *cj1168c* encodes a DedA family integral membrane protein of unknown function. DedA  
274 proteins are solute transporters widespread in bacteria but are mostly uncharacterised<sup>33</sup>.  
275 However, a homologue of *cj1168c* in the heavy metal specialist beta-proteobacterium  
276 *Cupriavidus metallidurans* has been shown to be involved in selenite (SeO<sub>3</sub><sup>2-</sup>) uptake<sup>34</sup>. We  
277 therefore speculated that Cj1168 could be a selenium oxyanion transporter that supplies Se  
278 for SeC biosynthesis. To test this, FDH activities were measured in *cj1168c* mutant and  
279 parental wildtype strains grown in minimal media with limiting concentrations of selenite or  
280 selenate (SeO<sub>4</sub><sup>2-</sup>). The data in Figure 4C shows that the *cj1168c* mutant displayed  
281 significantly reduced FDH activity after growth with selenite in the low nM range, and this  
282 phenotype was partially restored by genetic complementation. We therefore designated  
283 *cj1168c* as *selF* (selenium transporter for formate dehydrogenase). However, although this  
284 phenotype does suggest that SelF is a selenium importer, another unrelated selenium  
285 transporter, FdhT (Cj1500), has previously been documented in *C. jejuni*<sup>35</sup>, which is not  
286 epistatic with *fdhD* or *modE*. In contrast to this previous report we found considerable  
287 residual FDH activity still remained in an *fdhT* deletion mutant, which was fully restored to  
288 wildtype levels by complementation (Figure 4D).

289  
290 Finally, we tested whether the residual FDH activity in our *fdhT* mutant was due to selenium  
291 uptake by SelF. An *fdhT selF* double mutant was generated and assayed for FDH activity  
292 after growth in minimal media containing limiting concentrations of selenite or selenate  
293 (Figure 4D). The *fdhT selF* double mutant demonstrated a significant additional reduction in  
294 FDH activity over the *fdhT* single mutant, a phenotype that was partially restored by  
295 complementing the double mutant with *selF*. Complementation of the double mutant with  
296 *fdhT* returned FDH activity to near wildtype levels (Figure 4D). Taken together, our data  
297 suggests that both FdhT and SelF facilitate selenium acquisition in *C. jejuni*, possibly  
298 representing low and high affinity transporters, respectively (Figure 4E).

299

## 300 Discussion

301

302 Hybridization between distantly related organisms can bring together new gene combinations  
303 and traits that potentially allow adaptation in a single evolutionary leap<sup>36</sup>. However,  
304 introducing disharmony among genes that have coevolved in epistasis can lead to reduced  
305 hybrid fitness, limiting the chance of this type of evolution by saltation<sup>8,10</sup>. Evidence for these  
306 contrasting paradigms comes largely from eukaryotes, but among prokaryotes, widespread  
307 HGT may seem to contradict assumptions about selection against hybrid lineages. For  
308 example, the transfer of mobile resistance genes between bacterial strains and species can  
309 confer a clear adaptive benefit, in a single step, allowing the recipient lineages to proliferate  
310 in the presence of antibiotics. Clearly, therefore, epistasis is not an absolute barrier to long-  
311 range recombination in bacteria.

312

313 There is ongoing debate about the extent to which the galaxy of accessory genes that are  
314 variously present or absent in many bacterial genomes constitute a cache of mobile genes  
315 from which innovation can be drawn and transferred between strains or species<sup>37-40</sup>.  
316 However, considering HGT of accessory genes does not fully address the extent to which  
317 recombination is constrained by epistatic fitness interactions between genes. First, because

318 genes or gene clusters introduced as autonomous elements, encoding specific novel traits,  
319 may cause minimal disruption to other essential cellular functions. Second, even when  
320 introduced genes result in a concomitant change elsewhere in the genome<sup>41</sup>, the fitness cost  
321 may be outweighed by the benefit in a given niche. Third, and most importantly, because  
322 most recombination in bacteria is between homologous sequences<sup>21</sup>, where a given gene is  
323 replaced by another version of the same gene.

324  
325 *Campylobacter* is an ideal model organism for considering barriers to gene flow as  
326 interspecies recombination is well documented within the core genome. Consistent with  
327 previous studies<sup>23,24,42</sup>, we found that a large proportion (15-28%) of the core genome of the  
328 two common *C. coli* lineages found in livestock and human disease (CC-828 and CC-1150)  
329 originated in *C. jejuni*. It is challenging to explain this level of genome-wide gene flow  
330 between species after a prolonged period of diversification (~15% nucleotide divergence) as  
331 it would likely disrupt coadapted gene networks. The evident success of hybrid *C. coli* in the  
332 agricultural niche suggests that the accumulation of *C. jejuni* DNA was not detrimental, but  
333 to specifically address if genome coadaptation was a barrier to recombination requires  
334 quantification of covariation among alleles.

335  
336 Most bacteria, including *Campylobacter*, have highly genetically structured populations  
337 reflecting both neutral and adaptive evolutionary processes<sup>18</sup>. Therefore, a phylogenetically  
338 naive statistical model of coadaptation would afford equal significance to linkage  
339 disequilibrium resulting from selection and common ancestry. Even in recombinogenic  
340 bacteria such as *C. coli*, HGT is not sufficiently common to scramble the genome and abolish  
341 non-random SNP associations resulting from clonal population structure. Consistent with  
342 other models<sup>43</sup>, the statistical test developed here accounts for the amount of covariation that  
343 would be expected based upon the clonal frame and identifies the same combinations of  
344 alleles in independent genetic backgrounds, thus providing evidence for coadaptation.

345  
346 By combining the results from the chromosome painting and covariation models we were  
347 able to quantify the frequency of *C. coli* and *C. jejuni* SNPs in covarying allele pairs across  
348 the genome of introgressed *C. coli*. Recent interspecies admixture results in allele pairs, that  
349 correspond to *C. jejuni* – *C. coli* (and *vice versa*) and *C. jejuni* – *C. jejuni*. Comparing  
350 haplotype frequency provides the opportunity to contrast the disruptive and beneficial effects  
351 of homologous recombination in the bacterial genome. Under a neutral model, where  
352 recombination does not disrupt beneficial epistatic interactions, there would be more *C. jejuni*  
353 – *C. coli* than *C. jejuni* – *C. jejuni* covarying allele pairs in the recipient genome. Clearly,  
354 relatively low levels of covariation between ancestral *C. coli* and introgressed *C. jejuni* SNPs  
355 is expected, consistent with selection against disharmonious gene combinations in the  
356 coadapted recipient genome. However, the finding that *C. jejuni* – *C. jejuni* allele pairs  
357 constituted >83% of covarying introgressed haplotypes was striking. It is possible that in  
358 some cases both sites were introgressed in a single recombination event as bacteria can  
359 import very large pieces of DNA (>100kb)<sup>44-46</sup> but in *Campylobacter* LD for pairs of sites  
360 decreases with distance to approximately 20kbp and then remains at the same level for very  
361 distant sites<sup>47</sup>. Therefore, the divergent genome position of allele pairs (>20kb) implies that  
362 they were acquired independently. It follows, therefore, that the acquisition of the first  
363 introgression event was not fatal to the recipient genome, and was either mildly detrimental,  
364 neutral or beneficial. Acquisition of the second member of the pair then potentially enhanced  
365 the fitness restoring the integrated *C. jejuni* – *C. jejuni* coevolutionary unit.

366



367 Investigating covariation provides clues about genome plasticity and the potential benefit of  
368 introgression for niche adaptation. However, to directly address if genes are in epistasis it is  
369 necessary to test their function and confirm coadaptation. We demonstrated a functional link  
370 amongst the top scoring co-varying gene pairs with FDH, a key enzyme allowing the  
371 utilisation of formate as an electron donor *in vivo*<sup>30,31</sup>. In this study, FdhD and ModE were  
372 shown to be essential for FDH activity. While FdhD is a sulfur-transferase known to be  
373 required for the insertion of the pterin cofactor into FdhA<sup>48</sup> (Figure 4E), ModE is a  
374 transcriptional repressor that has been shown previously only to regulate the Mo/W uptake  
375 genes *mod* and *tup*<sup>49,50</sup>. However, the unexpected abolished FDH activity in a *modE* mutant  
376 indicates further functions for ModE in FDH biogenesis which warrant future investigation.  
377 Searching for functional links between *fdhD/modE* and *cj1167/selF/ppi*, revealed that a *selF*  
378 mutant strain had significantly reduced FDH activity under conditions of selenite limitation, a  
379 phenotype consistent with SelF being a Se oxyanion transporter and that functionally links  
380 SelF with FdhD/ModE. We suggest that *selF* rather than *fdhT* is epistatic because SelF  
381 confers an additional benefit for SeC biosynthesis (essential for FDH activity) under  
382 conditions of selenium limitation, for example as may be found in the host (Figure 4E).  
383 *cj1167* encodes a cytoplasmic NADPH dependent 2-oxoacid dehydrogenase but the current  
384 genome database annotation as lactate dehydrogenase (Ldh) is incorrect and its function is  
385 unknown<sup>51</sup>. There is no precedent for the involvement of such an enzyme in bacterial FDH or  
386 SeC biogenesis and we obtained no evidence for a functional connection between Cj1167 and  
387 FDH activity. However, the overlapping convergent gene arrangement of *cj1167* and *cj1168c*  
388 (*selF*) suggests a transcriptional architecture that might dictate these genes both form similar  
389 epistatic dependencies even if Cj1167 is not required for FDH activity. Finally, *cj1171c* (*ppi*)  
390 encodes a cytoplasmic peptidyl-prolyl *cis-trans* isomerase of the cyclophilin family. PPIases  
391 are general protein folding catalysts that often have pleiotropic and redundant functions<sup>52</sup> and  
392 we note that our *C. jejuni ppi* deletion mutant showed no growth defect as well as no  
393 reduction in FDH activity. It is possible that if Cj1171 does help promote the folding of e.g.  
394 FdhD or ModE, analysis of a simple deletion mutant may not reveal this if another PPIase  
395 can substitute in that genetic background.

396  
397 Explaining the aberrant genome architecture among introgressed *C. coli* is challenging.  
398 Understanding the selective value of genes that promote proliferation depends on the overall  
399 genetic environment<sup>19</sup>. Our findings are consistent with an evolutionary scenario where an  
400 ancestral *C. coli* lineage underwent a niche transition and the surviving lineages (CC-828 and  
401 CC-1150) gained access to *C. jejuni* DNA (Figure 3E&F). As the adaptive landscape of the  
402 genome changed, potentially decoupling epistatic interactions that were previously selected,  
403 new gene combinations could be introduced by recombination and tested in the *C. coli*  
404 genetic background. Recent studies have shown that this type of genetic rewiring may be  
405 more common than previously thought<sup>53-55</sup> and when it leads to the proliferation of a hybrid  
406 organism it can be associated with the colonization of a new niche. Intensive livestock  
407 systems represent a possible explanation for the genetic revolution in *C. coli*. Host ecology  
408 can dramatically affect the evolution of gut-dwelling organisms, including *Campylobacter*<sup>56</sup>  
409 and colonization of this niche could promote the conditions necessary to promote  
410 introgressed *C. coli*. Whether host ecology is a factor or not, it is clear that conditions can  
411 arise where coadapted genes in a highly interactive bacterial genome can be transferred  
412 between species and reinstated as a single evolutionary unit in a new genome. This suggests  
413 that epistasis is not an absolute barrier to genome-wide recombination in structured bacterial  
414 populations.

415  
416 **Methods**

417

## 418 **Isolates, genome sequencing and assembly**

419 A total of 973 isolates were used in this study, 827 from *C. coli* and a selection of 146 from a  
420 diversity of *C. jejuni* clonal complexes (Supplementary Data 3). Isolates were sampled  
421 mostly in the United Kingdom to maximise environmental and riparian reservoirs and thus  
422 the representation of genetic diversity in *C. coli*. Isolates were stored in a 20% (v/v) glycerol  
423 medium mix at -80°C and subcultured onto *Campylobacter* selective blood-free agar  
424 (mCCDA, CM0739, Oxoid). Plates were incubated at 42°C for 48 h under microaerobic  
425 conditions (5% CO<sub>2</sub>, 5% O<sub>2</sub>) generated using a CampyGen (CN0025, Oxoid) sachet in a  
426 sealed container. Subsequent phenotype assays were performed on Brucella agar (CM0271,  
427 Oxoid). Colonies were picked onto fresh plates and genomic DNA extraction was carried out  
428 using the QIAamp® DNA Mini Kit (QIAGEN; cat. number: 51306) according to the  
429 manufacturer's instructions. DNA was eluted in 100–200 µl of the supplied buffer and stored  
430 at -20°C. DNA was quantified using a Nanodrop spectrophotometer and high-throughput  
431 genome sequencing was performed on a MiSeq (Illumina, San Diego, CA, USA), using the  
432 Nextera XT Library Preparation Kit with standard protocols involving fragmentation of 2 µg  
433 genomic DNA by acoustic shearing to enrich for 600 bp fragments, A-tailing, adapter ligation  
434 and an overlap extension PCR using the Illumina 3 primer set to introduce specific tag  
435 sequences between the sequencing and flow cell binding sites of the Illumina adapter. DNA  
436 cleanup was carried out after each step to remove DNA < 150 bp using a 1:1 ratio of  
437 AMPure® paramagnetic beads (Beckman Coulter, Inc., USA). Short read paired-end data was  
438 assembled using the *de novo* assembly algorithm, SPAdes (version 3.10.0)<sup>57</sup>. All novel  
439 genome sequences (n=475) generated for use in this study are available on NCBI BioProjects  
440 PRJNA689604 and PRJEB11972. These were augmented with 498 previously published  
441 genomes and accession numbers for all genomes can be found in Supplementary Data  
442 3<sup>16,24,29,47,56,58-61</sup>.

443

444

## 445 **Genome archiving, pan-genome content analyses and phylogenetic reconstruction**

446 Contiguous genome sequence assemblies were individually archived on the web-based  
447 database platform BIGSDB<sup>62</sup> and sequence type (ST) and clonal complex (CC) designation  
448 were assigned based upon the *C. jejuni* and *C. coli* multi-locus sequence typing scheme<sup>63</sup>. To  
449 examine the full pan-genome content of the dataset, a reference pan-genome list was  
450 assembled as previously described<sup>64</sup>. Briefly, genome assemblies from all 973 genomes in  
451 this study were automatically annotated using the RAST/SEED platform<sup>65</sup>, the BLAST  
452 algorithm was used to determine whether coding sequences from this list were allelic variants  
453 of one another or 'unique' genes, with two alleles of the same gene being defined as sharing  
454 >70% sequence identity on >10% of the sequence length. The prevalence of each gene in the  
455 collection of 973 genomes was determined using BLAST with a positive hit in a genome  
456 being defined as a local alignment of the reference sequence with the genomic sequence of  
457 >70% identity on >50% of the length, as previously described<sup>66</sup>. The resulting matrix was  
458 analysed for differentiating core and accessory genome variation. Genes present in all  
459 genomes were concatenated to produce a core-genome alignment, used for subsequent  
460 phylogenetic reconstructions. Phylogenetic trees were reconstructed using an approximation  
461 of maximum-likelihood phylogenetics in FastTree2<sup>67</sup>. This tree was used as an input for  
462 ClonalFrameML<sup>68</sup> to produce core genome phylogenies with branch lengths corrected for  
463 recombination.

464

## 465 **Inference of introgression**

466 All 973 genomes were aligned to a full reference sequence of *C. coli* strain CVM29710. We  
467 conducted imputation for polymorphic sites with missing frequency  $\leq 10\%$  using BEAGLE<sup>69</sup>  
468 as previously reported<sup>70</sup>. A total of 286,393 gapless SNPs (~17% of the average *C. coli*  
469 genome size) were used for recombination analyses. The coancestry of genome-wide  
470 haplotype data was inferred based on alignments using chromosome painting  
471 and FineStructure<sup>71</sup> as previously described<sup>72</sup>. Briefly, ChromoPainter was used to infer  
472 chunks of DNA donated from a list of 33 donor groups normalised for sample size to each of  
473 677 ST-CC-828 and 12 CC-1150 recipient haplotypes. Results were summarised into a  
474 coancestry matrix containing the number of recombination-derived chunks from each donor  
475 to each recipient individual. FineStructure was then used for 100,000 iterations of both the  
476 burn-in and Markov chain Monte Carlo chain to cluster individuals based on the co-ancestry  
477 matrix. The results are visualized as a heat map with each cell indicating the proportion of  
478 DNA “chunks” (a series of SNPs with the same expected donor) a recipient receives from  
479 each donor.

480

### 481 **Analysis of covariation in bacterial genomes**

482 Non-random allele associations can result from selection and clonal population structure. To  
483 control for the latter, our approach identified SNP combinations in independent genetic  
484 backgrounds by accounting for the sequence variation associated with the inferred phylogeny.  
485 Based on the alignment of 677 genomes of *C. coli* CC-828, a first phylogenetic tree was  
486 created using PhyML<sup>73</sup>. ClonalFrameML<sup>68</sup> was then applied to correct the tree by accounting  
487 for the effect of recombination, and also to infer the ancestral sequence of each node.  
488 Covariance was assessed for pairs of biallelic sites across the genome using a Continuous  
489 Time Markov Chain (CTMC) model as follows. Briefly, let  $A$  and  $a$  denote the two alleles of  
490 the first site and  $B$  and  $b$  denote the two alleles of the second site, so that there are four states  
491 in total for the pair of sites ( $ab$ ,  $Ab$ ,  $aB$  and  $AB$ ). The four substitution rates from  $A$  to  $a$ , from  
492  $a$  to  $A$ , from  $B$  to  $b$  and from  $b$  to  $B$  are not assumed to be identical, to allow for differences in  
493 substitution rates in different parts of the genome and also to allow for non-equal rates of  
494 forward and backward substitution (for example as a result of recombination opportunities).  
495 Assuming no epistatic effect between the two sites ( $\varepsilon=1$ ), the model  $M_0$  has four free  
496 parameters ( $\alpha_1$ ,  $\alpha_2$ ,  $\beta_1$  and  $\beta_2$ ) representing independent substitutions at the two sites. We  
497 expand model  $M_0$  with an additional fifth parameter  $\varepsilon > 1$  into model  $M_1$  which is such that the  
498 state  $AB$  where the first site is allele  $A$  and the second site is allele  $B$  is favored relative to the  
499 other three sites  $ab$ ,  $aB$  and  $Ab$ . Specifically, the state  $AB$  has a probability increased by a  
500 factor  $\varepsilon^2$  in the stationary distribution of the CTMC of model  $M_1$  compared to model  $M_0$ .

501

502 Both models  $M_0$  (with 4 parameters) and  $M_1$  (with 5 parameters) are fitted to the data using  
503 maximum likelihood techniques, where the likelihood is equal to the product for every branch  
504 of the tree of the state at the bottom of the branch given the state at the top. The two fitted  
505 models  $M_0$  and  $M_1$  are then compared using a likelihood-ratio test (LRT) as follows: since  $M_0$   
506 is nested with  $M_1$ , two times their difference in log-likelihood is expected to be distributed  
507 according to a chi-square distribution with number of degrees of freedom equal to the  
508 difference in their dimensionality, which is one. This LRT returns a  $p$ -value for the  
509 significance of a covariation effect, and a Bonferroni correction is applied to determine a  
510 conservative cutoff of significance that accounts for multiple testing. Furthermore, the test is  
511 applied only to pairs of sites separated by  $>20\text{kb}$  to reduce the chance that they were the  
512 result of a single recombination event, consistent with estimates of the length of recombined  
513 DNA sequence in quantitative bacterial transformation experiments<sup>44,74</sup> and evidence from  
514 *Campylobacter* genome analyses that show that LD for pairs of sites decreases with distance  
515 to approximately 20kbp and then remains at the same level for very distant sites<sup>47</sup>. It is still

516 possible of course that rare recombination events would stretch 20kbp<sup>44-46</sup>, but for this to  
517 have an effect on the analysis of epistasis it would have to have happened several times for  
518 the same pairs of sites against different genomic background which becomes quite unlikely  
519 just by chance. This phylogenetically aware approach to testing for covariance presents the  
520 advantage to naturally account for both population structure and the effect of  
521 recombination<sup>75</sup>. The script implementing this coevolution test is available in R at:  
522 <https://github.com/xavierdidelot/campy>.

523

### 524 **Quantifying covariation between recombined and unrecombined genomic regions**

525 The results of the introgression and covariation analyses were combined so that for each pair  
526 of significantly covarying SNPs ( $p$ -value  $<10^{-8}$ ), haplotype frequency was calculated among  
527 the 689 recipient introgressed *C. coli* clade-1 strains as well as among the donor *C. coli*  
528 (ancestral) and *C. jejuni* strains, respectively. If the most frequent haplotype of the pair is the  
529 same between the donor *C. coli* (ancestral) and *C. jejuni*, it was classified as ‘no  
530 polymorphism’. Otherwise, if the most frequent haplotype accounted for  $>90\%$  among the  
531 recipients, it was classified as either ‘*C. jejuni* ( $>90\%$ )’ or ‘*C. coli* ( $>90\%$ )’ if it was the same  
532 as that of donor *C. jejuni* or *C. coli* (ancestral) (inset in Figure 3C). If the most frequent  
533 haplotype accounted for  $\leq 90\%$  among the recipients, the top two most frequent haplotypes  
534 (written as major and minor haplotype in this manuscript) were indicated as either “*C. jejuni* /  
535 *C. coli*”, “*C. jejuni* / other”, “*C. coli* / *C. jejuni*”, “*C. coli* / other”, “other / *C. coli*”, “other / *C.*  
536 *jejuni*”, and “other / other”, and the frequency of the major and minor haplotypes were  
537 calculated. For example, where the haplotype frequencies were as follows, AA=285,  
538 TA=192, TG=181, AG=27, A-=2, -=1, -A=1, AA is the major haplotype, frequency of  
539 which is 41.3%

540

### 541 **Mutagenesis and complementation cloning**

542 Genes *cj1167*, *cj1168c* (here designated *selF* for selenium transport for formate  
543 dehydrogenase), *cj1171c* (*ppi*), *cj1507c* (*modE*), *cj1508c* (*fdhD*) and *cj1500* (*fdhT*) were  
544 deleted by allelic exchange mutagenesis, with the majority of the open reading frame  
545 replaced by an antibiotic resistance cassette. Mutagenesis plasmids were generated by the  
546 isothermal assembly method using the HiFi system (NEB, UK). In brief, flanking regions of  
547 target genes were PCR amplified from genomic DNA using primers with adaptors  
548 homologous to either the backbone vector pGEM3ZF or the antibiotic resistance cassette  
549 (Supplementary Data 4). pGEM3ZF was linearised by digestion with HincII. The kanamycin  
550 and chloramphenicol resistance cassettes were PCR amplified from pJMK30 and pAV35,  
551 respectively<sup>76</sup>. Four fragments consisting of linearised pGEM3ZF, antibiotic resistance  
552 cassette and 2 flanking regions were combined in equimolar amounts and mixed with 2 x  
553 HiFi reagent (NEB, UK) and incubated at 50°C for 1 hour. The fragments combine such that  
554 the gene fragments flank the antibiotic resistance cassette, in the same transcriptional  
555 orientation, within the vector. Mutagenesis plasmids were transformed into *C. jejuni* NCTC  
556 11168 by electroporation. Spontaneous double-crossover recombinants were selected for  
557 using the appropriate antibiotic and correct insertion into the target gene confirmed by PCR  
558 screening. For genetic complementation of mutants, genes *cj1168c* (*selF*), *cj1507c* (*modE*),  
559 *cj1508c* (*fdhD*) and *cj1500* (*fdhT*) were PCR amplified from genomic DNA, restriction  
560 digested with MfeI and XbaI, then ligated into similarly digested pRRA<sup>77</sup> (Supplementary  
561 Data 4). The orientation of insertion allowed the target gene to be expressed constitutively by  
562 a chloramphenicol resistance gene-derived promoter within the vector. Complementation  
563 plasmids were transformed into *C. jejuni* by electroporation. Spontaneous double-crossover  
564 recombinants were selected for using apramycin and correct insertion into the ribosomal  
565 locus confirmed by PCR screening.



566

### 567 **Growth of *C. jejuni***

568 Microaerobic growth cabinets (Don Whitley, UK) were maintained at 42°C with an  
569 atmosphere of 10% O<sub>2</sub>, 5% CO<sub>2</sub> and 85% N<sub>2</sub> (v/v). *C. jejuni* was grown on Columbia-base  
570 agar containing 5% v/v defibrinated horse blood. Selective antibiotics were added to plates as  
571 appropriate at the following concentrations: 50 µg ml<sup>-1</sup> kanamycin, 20 µg ml<sup>-1</sup>  
572 chloramphenicol, 60 µg ml<sup>-1</sup> apramycin. Muller-Hinton (MH) broth supplemented with 20  
573 mM L-serine was used as a rich medium. Minimal medium was prepared from a supplied  
574 MEM base (51200-38, Thermo Scientific, UK) with the following additions: 20 mM L-  
575 serine, 0.5 mM sodium pyruvate, 50 µM sodium metabisulfite, 4 mM L-cysteine. HCl, 2 mM  
576 L-methionine, 5 mM L-glutamine, 50 µM ferrous sulfate, 100 µM ascorbic acid, 1 µM  
577 vitamin B12, 5 µM sodium molybdate, 1 µM sodium tungstate. Selenium was then added as  
578 appropriate from stocks of sodium selenate or sodium selenite prepared in dH<sub>2</sub>O. For assays,  
579 cells were washed and suspended in sterile phosphate-buffered saline (PBS, Sigma-Aldrich).

580

### 581 **Respiration rates with formate**

582 Cells were first grown in MH broth for 12 hours, then washed thoroughly in PBS before  
583 inoculating minimal media without an added selenium source. The appropriate concentrations  
584 were determined by serial dilution trials and it was subsequently found that *C. jejuni* has a  
585 strong preference for selenite over selenate, as equivalent FDH activity requires some 1000-  
586 fold greater concentration of selenate than selenite (Supplementary Figure 6). These cultures  
587 were grown for 8 hours before the cells were thoroughly washed again, then used to inoculate  
588 further minimal media, with a selenium source added as appropriate, and grown for 10 hours.  
589 This passaging was necessary to remove all traces of selenium from the inoculum, such that  
590 control cultures without selenium added had negligible (FDH) activity. Assay cultures were  
591 again thoroughly washed before the equivalent of 20 ml at an optical density of 0.8 at 600 nm  
592 was finally suspended in 1 ml of PBS. Formate-dependent oxygen consumption by whole  
593 cells was measured in a Clark-type electrode using 20 mM sodium formate as electron  
594 donor. The electrode was calibrated with air-saturated PBS assuming 220 nmol dissolved O<sub>2</sub>  
595 ml<sup>-1</sup> at 37 °C. In the electrode, 200 µl of the dense cell suspension was added to 800 µl air-  
596 saturated PBS for a final volume of 1 ml. The chamber was sealed and the suspension  
597 allowed to equilibrate for 2 minutes. The assay was initiated by the addition of 20 µl of 1 M  
598 sodium formate (prepared in PBS) and the rate of oxygen consumption recorded for 90 s. The  
599 total protein concentration of the cell suspensions was determined by Lowry assay and the  
600 specific rate of formate-dependent oxygen consumption expressed as nmol oxygen consumed  
601 min<sup>-1</sup> mg<sup>-1</sup> total protein.

602

### 603 **Data availability**

604 Short-read sequence data for all isolates sequenced in this study are deposited in the sequence  
605 read archive (SRA) and can be found associated with NCBI BioProjects PRJNA689604  
606 (<https://www.ncbi.nlm.nih.gov/bioproject/PRJNA689604>) and PRJEB11972  
607 (<https://www.ncbi.nlm.nih.gov/bioproject/PRJEB11972>). These were augmented with 498  
608 previously published genomes and assembled genomes are available on Figshare  
609 ([doi.org/10.6084/m9.figshare.13521683](https://doi.org/10.6084/m9.figshare.13521683)). Accession numbers for all genomes are included in  
610 Supplementary Data 3. Source data are provided for this paper.

611

### 612 **Acknowledgements**



613 This work was supported by Wellcome Trust grants 088786/C/09/Z and Medical Research  
614 Council (MRC) grants MR/M501608/1 and MR/L015080/1 awarded to SKS. Bacterial  
615 sampling was funded by Food Standards Agency project FS101087. AJT was supported by a  
616 Biotechnology and Biological Sciences Research Council grant (BB/S014497/1) awarded to  
617 DJK. GM was supported by a NISCHR Health Research Fellowship (HF-14-13). JC was  
618 supported by the ERC grant no. 742158. Computational calculations were performed using  
619 computer servers from the MRC CLIMB project (UK), at National Institute of Genetics  
620 (Japan) and the Human Genome Center of the Institute of Medical Science (University of  
621 Tokyo, Japan) and at HPC Wales (UK).

622

### 623 **Author Contributions**

624 S.S., X.D. D.F. and K.Y. conceived and designed the study. S.S., N.W., A.V. and M.M.  
625 collected samples. G.M., A.T., L.M., M.H. and B.P. carried out Laboratory work. B.P., M.H.,  
626 K.J., M.M., J.P. and S.S. supported data archiving. G.M., A.T., X.D., K.Y., L.M., S.P., S.S.  
627 and J.C. analysed the data. M.M., J.P., J.C., D.K. and D.F. contributed to data interpretation.  
628 S.S., B.P., G.M., C. K., A.T. and D.K. wrote the paper.

629

### 630 **Competing Interests**

631 The authors declare no competing interests.

632

633

634

635 **Figure legends**

636

637 **Figure 1. Population genomics of *C. jejuni* and *C. coli*.** (A) Phylogenetic tree reconstructed  
638 using neighbour-joining on a whole-genome alignment of 973 *C. jejuni* and *C. coli* isolates.  
639 Introgressed *C. coli* clades are represented with red (CC-828, n=677) and purple (CC-1150,  
640 n=12) circles, unintrogressed clade 1 (n=35) is shown in pink, clade 2 (n=45) in yellow and  
641 clade 3 (n=58) in green. A set of 146 *C. jejuni* genomes belonging to 30 clonal complexes (4  
642 to 5 isolates per ST) are shown in blue. Recipient and donor populations, used to infer  
643 introgression in chromosome painting analysis, are indicated. The scale bar represents the  
644 number of substitutions per site. (B) Accumulation curves of the clade-specific pan-genome  
645 content of *Campylobacter* lineages, using the same colour code as panel A. Randomized  
646 genome sampling was used to obtain the average number of genes for each comparison (plain  
647 lines) and standard deviations (dotted lines). (C) The average number of genes/genome,  
648 identified by BLAST, is shown for *C. jejuni* and the different *C. coli* clades. Asterisks denote  
649 significant difference between distributions as inferred from a Dunn's multiple comparisons  
650 test after a Kruskal-Wallis test, as follows: \*\*\*:  $p < 0.001$ ; \*\*\*\*:  $p < 0.0001$ .

651

652 **Figure 2. Genome-wide introgression from *C. jejuni* to *C. coli*.** (A) Summary of  
653 introgressed *C. jejuni* SNPs in *C. coli* CC-828 (n=677, red) and CC-1150 (n=12, purple)  
654 genomes using ChromoPainter; the number of introgressed core SNPs (coloured histograms;  
655 left y-axis) and core genes (white histograms; right y-axis) for a range of recipient strains  
656 proportions (at least 1, more than 50% and more than 98%) is shown. (B) The number of  
657 genes with different frequencies of maximum SNP introgression/gene in *C. coli* as a function  
658 of gene frequency in *C. jejuni*. Highly introgressed genes in CC-828 and CC-1150 tend to be  
659 core in *C. jejuni*. (C) Density plot (n=1000 bins) of specific and shared introgression events  
660 in CC-828 (x-axis) and CC-1150 (y-axis). The frequency of SNP introgression/gene is shown  
661 for both lineages. Close blue lines denote a high density of points. (D) Shared introgression  
662 between *C. coli* CC-828 and CC-1150. The number of SNPs being shared between the two  
663 lineages at various frequencies is shown in y-axis. (E) Diagram of *Campylobacter* species  
664 and clade (C1\*, C2, C3) divergence with arrows indicating introgression from *C. jejuni* into  
665 *C. coli* (i) clade 1, (ii, iii) CC-828 and CC-1150, (iv, v) subsequent clonal expansion and  
666 ongoing introgression. (F) Pairwise nucleotide identity between *C. jejuni* and ancestral  
667 (unintrogressed) clade 1 *C. coli* core genes (black circles). Genes found to be introgressed in  
668 clade 1 CC-828 are highlighted in blue.

669

670 **Figure 3. Covariation in introgressed *C. coli* genomes.** (A) CC-828 and CC-1150 *C. coli*  
671 genomes were analysed using a continuous time Markov chain (CTMC) model and  
672 covariation was assessed for pairs of biallelic sites separated by at least 20kb along the  
673 genome while accounting for the effect of population structure and recombination. There are  
674 many biallelic sites that do not change often on the tree and few that do. Putative epistatic  
675 sites change more frequently than average with biallelic pairs found together on multiple  
676 branches. (B) Miami plot of each polymorphic site showing the maximum *p*-value for  
677 covarying biallelic pairs (>20kb apart) and the frequency of introgression in CC-828 and CC-  
678 1150. (C) The frequency of major and minor haplotype combinations (inset) among the 2578  
679 pairs of covarying SNPs in the 689 *C. coli* clade-1 recipient genomes, revealing that the  
680 majority of long range covariation was between introgressed *C. jejuni* sites. (D) The position  
681 of putative epistatic sites mapped on the *C. coli* CVM29710 reference for covarying *C.*  
682 *jejuni*-*C. jejuni* SNPs (red) in 16 gene pairs (a to l), and other haplotype combinations (grey).  
683 (E and F) An evolutionary scenario for the observed patterns of covariation and introgression  
684 in natural *C. coli* populations: (i) *C. jejuni* (blue) and unintrogressed *C. coli* (red) co-exist

685 with genomes (internal circles) harbouring haplotype pairs (x-x) that segregate by species; (ii)  
686 Horizontal gene transfer, HGT, occurs (R1) disrupting covarying genetic elements and  
687 reducing the relative fitness of introgressed *C. coli* to varying degrees (grey arrow), few  
688 strains retain mixed *C. coli* - *C. jejuni* haplotypes; (iii) HGT continues (R2) and, where  
689 recombined mixed haplotypes survived, ancestral *C. jejuni* haplotype pairs are reinstated in  
690 introgressed *C. coli*; (iv,v) introgressed *C. coli* outcompete unintrogressed strains.

691

692 **Figure 4. Genomic context and physiological roles of introgressed epistatically linked**

693 **genes.** (A) Genome organisation and percentage of co-varying SNP pairs (internal legend).

694 (B-D) FDH activity of whole cells determined by oxygen consumption rates in a Clark-type

695 electrode (nmol oxygen consumed per minute per mg of total protein) for (B) cells grown in

696 rich media (excess selenium), (C) cells grown in minimal media with 0.5 nM sodium selenite,

697 and (D) cells grown in minimal media with either 5 nM sodium selenite (left, open bars) or 5

698  $\mu$ M sodium selenate (right, hashed bars). All data are means of at least 4 independent

699 determinations and error bars are SD. \*\*\* denotes *p* value of <0.001 by students *t*-test. (E)

700 Model for epistatically linked genes involving FDH biogenesis and activity. Host derived

701 formate is converted to bicarbonate in the periplasm by the FDH complex to release electrons

702 which are transferred from the iron sulfur (FeS) cluster of FdhA to the *b*-type hemes of FdhC

703 and into the menaquinone (MK) pool where they can ultimately be used to reduce molecular

704 oxygen via terminal oxidases. FdhA contains a selenocysteine residue and Mo/W-pterin

705 cofactor (W/MoCo) at its active site, both of which are essential for catalysis. ModE is a

706 DNA binding regulator which represses the Mo and W transporters Mod and Tup to regulate

707 the cellular pool of Mo/W. W/MoCo is generated by the Moe pathway and inserted into apo-

708 FdhA by the sulphur-transferase FdhD. Environmental selenite (the most abundant oxyanion)

709 or selenate diffuses into the periplasm where it must be actively imported to the cytoplasm by

710 FdhT and SelF. Putatively, FdhT is low affinity and functions efficiently when ample

711 selenium is available. When selenium is limited, SelF can import sufficient selenium to

712 maintain FDH production and activity. Cytoplasmic selenium is converted to

713 selenophosphate by SelD, which is used by SelA to generate tRNA-SeC from tRNA-Ser.

714 During translation of FdhA, tRNA-SeC is incorporated by the specific elongation factor SelB.

715 Apo-FdhA with W/MoCo and SeC inserted is then transported to the periplasm by the TAT

716 translocation system and incorporated into the FDH complex (See <sup>31</sup> for a review of FDH in

717 *C. jejuni*).

718

719

720

721

722 **References**

- 723 1 Ochman, H., Lawrence, J. G. & Groisman, E. A. Lateral gene transfer and the nature  
724 of bacterial innovation. *Nature* **405**, 299-304 (2000).
- 725 2 Koonin, E. V., Makarova, K. S. & Aravind, L. Horizontal gene transfer in  
726 prokaryotes: quantification and classification. *Annu. Rev. Microbiol.* **55**, 709-742  
727 (2001).
- 728 3 Haldane, J. B. A defense of beanbag genetics. *Perspect Biol Med* **7**, 343-359 (1964).
- 729 4 Bateson, W. in *Darwin And Modern Science* 85–101 (Cambridge University Press,  
730 1909).
- 731 5 Fisher, R. A. The correlation between relatives on the supposition of Mendelian  
732 inheritance. *Trans. R. Soc. Edinb* **52**, 399–433 (1918).
- 733 6 Wright, S. Evolution in Mendelian populations. *Genetics* **16**, 97-159 (1931).
- 734 7 Dobzhansky, T. Studies on hybrid sterility. II. Localization of sterility factors in  
735 *Drosophila Pseudoobscura* hybrids. *Genetics* **21**, 113-135 (1936).
- 736 8 Dobzhansky, T. *Genetics And The Origin Of Species*. (Columbia University Press,  
737 1937).
- 738 9 Muller, H. J. Bearing of the *Drosophila* work on systematics. *The new systematics*,  
739 185-268 (1940).
- 740 10 Muller, H. Isolating mechanisms, evolution, and temperature. *Biol. Symp.* **6**, 71-125  
741 (1942).
- 742 11 Kimura, M. Attainment of quasi linkage equilibrium when gene frequencies are  
743 changing by natural selection. *Genetics* **52**, 875-890 (1965).
- 744 12 Neher, R. A. & Shraiman, B. I. Competition between recombination and epistasis can  
745 cause a transition from allele to genotype selection. *Proc. Natl. Acad. Sci.* **106**, 6866-  
746 6871 (2009).
- 747 13 Wilson, D. J. *et al.* Rapid evolution and the importance of recombination to the  
748 gastroenteric pathogen *Campylobacter jejuni*. *Mol. Biol. Evol.* **26**, 385-397 (2009).
- 749 14 Gibson, B., Wilson, D. J., Feil, E. & Eyre-Walker, A. The distribution of bacterial  
750 doubling times in the wild. *Proc. R. Soc. B.* **285** (2018).
- 751 15 Vos, M. & Didelot, X. A comparison of homologous recombination rates in bacteria  
752 and archaea. *Isme J* **3**, 199-208 (2009).
- 753 16 Calland, J. K. *et al.* Quantifying bacterial evolution in the wild: a birthday problem for  
754 *Campylobacter* lineages. *Preprint* at  
755 <https://www.biorxiv.org/content/10.1101/2020.12.02.407999v1> (2020).
- 756 17 Arnold, B. J. *et al.* Weak epistasis may drive adaptation in recombining bacteria.  
757 *Genetics* **208**, 1247-1260 (2018).
- 758 18 Sheppard, S. K., Guttman, D. S. & Fitzgerald, J. R. Population genomics of bacterial  
759 host adaptation. *Nat. Rev. Genet.* **19**, 549-565 (2018).
- 760 19 Mayr, E. in *Evolution as a Process* 157–180 (Allen & Unwin, 1954).
- 761 20 Orr, H. A. Dobzhansky, Bateson, and the genetics of speciation. *Genetics* **144**, 1331-  
762 1335 (1996).
- 763 21 Fraser, C., Hanage, W. P. & Spratt, B. G. Recombination and the nature of bacterial  
764 speciation. *Science* **315**, 476-480 (2007).
- 765 22 Sheppard, S. K. *et al.* *Campylobacter* genotyping to determine the source of human  
766 infection. *Clin. Infect. Dis.* **48**, 1072-1078 (2009).
- 767 23 Sheppard, S. K., McCarthy, N. D., Falush, D. & Maiden, M. C. Convergence of  
768 *Campylobacter* species: implications for bacterial evolution. *Science* **320**, 237-239  
769 (2008).
- 770 24 Sheppard, S. K. *et al.* Progressive genome-wide introgression in agricultural  
771 *Campylobacter coli*. *Mol. Ecol.* **22**, 1051-1064 (2013).

- 772 25 Provine, W. B. in *Genetics, Speciation And The Founder Principle* 43-76 (Oxford  
773 University Press, 1989).
- 774 26 Cohan, F. M. in *Genetics of Mate Choice: From Sexual Selection to Sexual Isolation*  
775 359-370 (Springer, 2002).
- 776 27 Ansari, M. A. & Didelot, X. Inference of the properties of the recombination process  
777 from whole bacterial genomes. *Genetics* **196**, 253-265 (2014).
- 778 28 Retchless, A. C. & Lawrence, J. G. Phylogenetic incongruence arising from  
779 fragmented speciation in enteric bacteria. *Proc. Natl. Acad. Sci.* **107**, 11453-11458  
780 (2010).
- 781 29 Dearlove, B. L. *et al.* Rapid host switching in generalist *Campylobacter* strains erodes  
782 the signal for tracing human infections. *Isme J* **10**, 721-729 (2016).
- 783 30 Weerakoon, D. R., Borden, N. J., Goodson, C. M., Grimes, J. & Olson, J. W. The role  
784 of respiratory donor enzymes in *Campylobacter jejuni* host colonization and  
785 physiology. *Microb. Pathog.* **47**, 8-15 (2009).
- 786 31 Taylor, A. J. & Kelly, D. J. The function, biogenesis and regulation of the electron  
787 transport chains in *Campylobacter jejuni*: New insights into the bioenergetics of a  
788 major food-borne pathogen. *Adv. Microb. Physiol.* **74**, 239-329 (2019).
- 789 32 Smart, J. P., Cliff, M. J. & Kelly, D. J. A role for tungsten in the biology of  
790 *Campylobacter jejuni*: tungstate stimulates formate dehydrogenase activity and is  
791 transported via an ultra-high affinity ABC system distinct from the molybdate  
792 transporter. *Mol. Microbiol.* **74**, 742-757 (2009).
- 793 33 Doerrler, W. T., Sikdar, R., Kumar, S. & Boughner, L. A. New functions for the  
794 ancient DedA membrane protein family. *J. Bacteriol.* **195**, 3-11 (2013).
- 795 34 Ledgham, F., Quest, B., Vallaey, T., Mergeay, M. & Covès, J. A probable link  
796 between the DedA protein and resistance to selenite. *Res. Microbiol.* **156**, 367-374  
797 (2005).
- 798 35 Shaw, F. L. *et al.* Selenium-dependent biogenesis of formate dehydrogenase in  
799 *Campylobacter jejuni* is controlled by the *fdhTU* accessory genes. *J. Bacteriol.* **194**,  
800 3814-3823 (2012).
- 801 36 Rieseberg, L. H. Hybrid origins of plant species. *Annu. Rev. Ecol. Syst.* **28**, 359-389  
802 (1997).
- 803 37 Andreani, N. A., Hesse, E. & Vos, M. Prokaryote genome fluidity is dependent on  
804 effective population size. *Isme J* **11**, 1719-1721 (2017).
- 805 38 Vos, M. & Eyre-Walker, A. Are pangenomes adaptive or not? *Nature Microbiol.* **2**,  
806 1576-1576 (2017).
- 807 39 Shapiro, B. J. The population genetics of pangenomes. *Nature Microbiol.* **2**, 1574-  
808 1574 (2017).
- 809 40 McInerney, J. O., McNally, A. & O'Connell, M. J. Why prokaryotes have  
810 pangenomes. *Nature Microbiol.* **2**, 17040 (2017).
- 811 41 Levin, B. R., Perrot, V. & Walker, N. Compensatory mutations, antibiotic resistance  
812 and the population genetics of adaptive evolution in bacteria. *Genetics* **154**, 985-997  
813 (2000).
- 814 42 Sheppard, S. K., McCarthy, N. D., Jolley, K. A. & Maiden, M. C. J. Introgression in  
815 the genus *Campylobacter*: generation and spread of mosaic alleles. *Microbiology* **157**,  
816 1066-1074 (2011).
- 817 43 Pensar, J. *et al.* Genome-wide epistasis and co-selection study using mutual  
818 information. *Nucleic Acids Res.* **47**, e112-e112 (2019).
- 819 44 Croucher, N. J., Harris, S. R., Barquist, L., Parkhill, J. & Bentley, S. D. A high-  
820 resolution view of genome-wide pneumococcal transformation. *PLoS Path.* **8**,  
821 e1002745 (2012).



- 822 45 He, M. *et al.* Evolutionary dynamics of *Clostridium difficile* over short and long time  
823 scales. *Proc. Natl. Acad. Sci.* **107**, 7527-7532 (2010).
- 824 46 Power, P. M., Bentley, S. D., Parkhill, J., Moxon, E. R. & Hood, D. W. Investigations  
825 into genome diversity of *Haemophilus influenzae* using whole genome sequencing of  
826 clinical isolates and laboratory transformants. *BMC Microbiol.* **12**, 273 (2012).
- 827 47 Yahara, K. *et al.* Genome-wide association of functional traits linked with  
828 *Campylobacter jejuni* survival from farm to fork. *Environ. Microbiol.* **19**, 361-380  
829 (2017).
- 830 48 Arnoux, P. *et al.* Sulphur shuttling across a chaperone during molybdenum cofactor  
831 maturation. *Nat. Commun.* **6**, 6148 (2015).
- 832 49 Taveirne, M. E., Sikes, M. L. & Olson, J. W. Molybdenum and tungsten in  
833 *Campylobacter jejuni*: their physiological role and identification of separate  
834 transporters regulated by a single ModE-like protein. *Mol. Microbiol.* **74**, 758-771  
835 (2009).
- 836 50 Aguilar-Barajas, E., Díaz-Pérez, C., Ramírez-Díaz, M. I., Riveros-Rosas, H. &  
837 Cervantes, C. Bacterial transport of sulfate, molybdate, and related oxyanions.  
838 *BioMetals* **24**, 687-707 (2011).
- 839 51 Thomas, M. T. *et al.* Two respiratory enzyme systems in *Campylobacter jejuni* NCTC  
840 11168 contribute to growth on l-lactate. *Environ. Microbiol.* **13**, 48-61 (2011).
- 841 52 Ünal, C. M. & Steinert, M. Microbial peptidyl-prolyl cis/trans isomerases (PPIases):  
842 virulence factors and potential alternative drug targets. *Microbiol. Mol. Biol. Rev.* **78**,  
843 544-571 (2014).
- 844 53 Oren, Y. *et al.* Transfer of noncoding DNA drives regulatory rewiring in bacteria.  
845 *Proc. Natl. Acad. Sci.* **111**, 16112-16117 (2014).
- 846 54 Arnold, B. *et al.* Fine-scale haplotype structure reveals strong signatures of positive  
847 selection in a recombining bacterial pathogen. *Mol. Biol. Evol.* **37**, 417-428 (2019).
- 848 55 Wadsworth, C. B., Arnold, B. J., Sater, M. R. A. & Grad, Y. H. Azithromycin  
849 resistance through interspecific acquisition of an epistasis-dependent efflux pump  
850 component and transcriptional regulator in *Neisseria gonorrhoeae*. *mBio* **9**, e01419-  
851 01418 (2018).
- 852 56 Mourkas, E. *et al.* Agricultural intensification and the evolution of host specialism in  
853 the enteric pathogen *Campylobacter jejuni*. *Proc. Natl. Acad. Sci.* **117**, 11018-11028  
854 (2020).
- 855 57 Bankevich, A. *et al.* SPAdes: a new genome assembly algorithm and its applications  
856 to single-cell sequencing. *Journal of computational biology : a journal of*  
857 *computational molecular cell biology* **19**, 455-477 (2012).
- 858 58 Sheppard, S. K. *et al.* Genome-wide association study identifies vitamin B5  
859 biosynthesis as a host specificity factor in *Campylobacter*. *Proc. Natl. Acad. Sci.* **110**,  
860 11923-11927 (2013).
- 861 59 Sheppard, S. K. *et al.* Cryptic ecology among host generalist *Campylobacter jejuni* in  
862 domestic animals. *Mol. Ecol.* **23**, 2442-2451 (2014).
- 863 60 Pascoe, B. *et al.* Local genes for local bacteria: evidence of allopatry in the genomes  
864 of transatlantic *Campylobacter* populations. *Mol. Ecol.* **26**, 4497-4508 (2017).
- 865 61 Pascoe, B. *et al.* Genomic epidemiology of *Campylobacter jejuni* associated with  
866 asymptomatic pediatric infection in the Peruvian Amazon. *PLoS Negl. Trop. Dis.* **14**,  
867 e0008533 (2020).
- 868 62 Jolley, K. A. & Maiden, M. C. J. BIGSdb: scalable analysis of bacterial genome  
869 variation at the population level. *BMC Bioinformatics* **11**, 595 (2010).
- 870 63 Dingle, K. E. *et al.* Multilocus sequence typing system for *Campylobacter jejuni*. *J.*  
871 *Clin. Microbiol.* **39**, 14-23 (2001).

- 872 64 Méric, G. *et al.* A reference pan-genome approach to comparative bacterial genomics:  
873 identification of novel epidemiological markers in pathogenic *Campylobacter*. *PLOS*  
874 *One* **9**, e92798 (2014).
- 875 65 Aziz, R. K. *et al.* The RAST server: rapid annotations using subsystems technology.  
876 *BMC Genomics* **9**, 75 (2008).
- 877 66 Sheppard, S. K., Jolley, K. A. & Maiden, M. C. J. A gene-by-gene approach to  
878 bacterial population genomics: whole genome MLST of *Campylobacter*. *Genes* **3**,  
879 261-277 (2012).
- 880 67 Price, M. N., Dehal, P. S. & Arkin, A. P. FastTree 2 – approximately maximum-  
881 likelihood trees for large alignments. *PLOS One* **5**, e9490 (2010).
- 882 68 Didelot, X. & Wilson, D. J. ClonalFrameML: efficient inference of recombination in  
883 whole bacterial genomes. *PLoS Comp. Biol.* **11**, e1004041 (2015).
- 884 69 Browning, B. L. & Browning, S. R. A unified approach to genotype imputation and  
885 haplotype-phase inference for large data sets of trios and unrelated individuals. *Am. J.*  
886 *Hum. Genet.* **84**, 210-223 (2009).
- 887 70 Yahara, K. *et al.* Chromosome painting *in silico* in a bacterial species reveals fine  
888 population structure. *Mol. Biol. Evol.* **30**, 1454-1464 (2013).
- 889 71 Lawson, D. J., Hellenthal, G., Myers, S. & Falush, D. Inference of population  
890 structure using dense haplotype data. *PLoS Genet.* **8**, e1002453 (2012).
- 891 72 Yahara, K., Didelot, X., Ansari, M. A., Sheppard, S. K. & Falush, D. Efficient  
892 inference of recombination hot regions in bacterial genomes. *Mol. Biol. Evol.* **31**,  
893 1593-1605 (2014).
- 894 73 Guindon, S. *et al.* New algorithms and methods to estimate maximum-likelihood  
895 phylogenies: assessing the performance of PhyML 3.0. *Syst. Biol.* **59**, 307-321 (2010).
- 896 74 Mell, J. C., Shumilina, S., Hall, I. M. & Redfield, R. J. Transformation of natural  
897 genetic variation into *Haemophilus influenzae* genomes. *PLoS Path.* **7**, e1002151-  
898 e1002151 (2011).
- 899 75 Collins, C. & Didelot, X. A phylogenetic method to perform genome-wide association  
900 studies in microbes that accounts for population structure and recombination. *PLoS*  
901 *Comp. Biol.* **14**, e1005958 (2018).
- 902 76 van Vliet, A. H., Wooldridge, K. G. & Ketley, J. M. Iron-responsive gene regulation  
903 in a *Campylobacter jejuni* *fur* mutant. *J. Bacteriol.* **180**, 5291-5298 (1998).
- 904 77 Cameron, A. & Gaynor, E. C. Hygromycin B and apramycin antibiotic resistance  
905 cassettes for use in *Campylobacter jejuni*. *PLOS One* **9**, e95084 (2014).

906

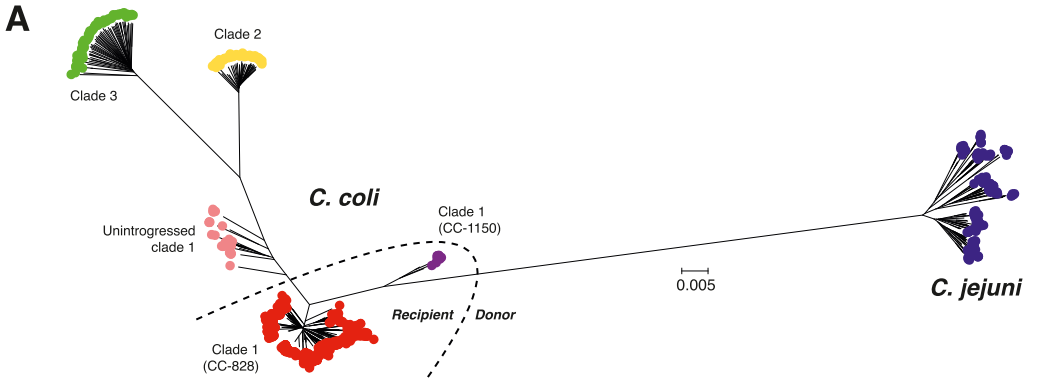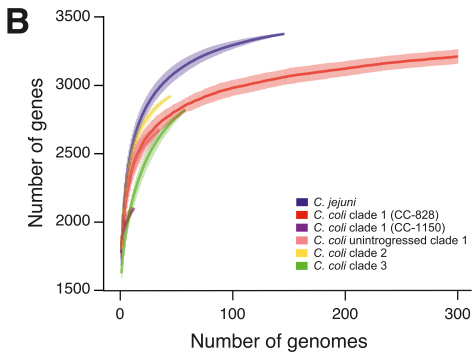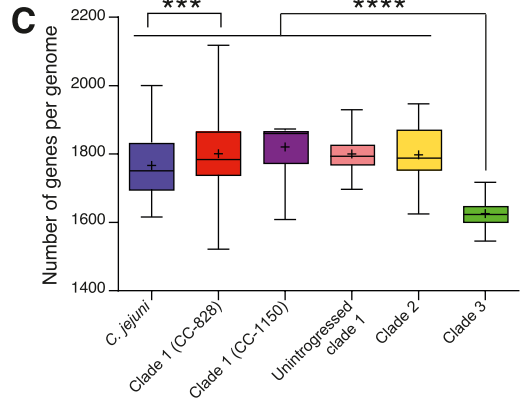

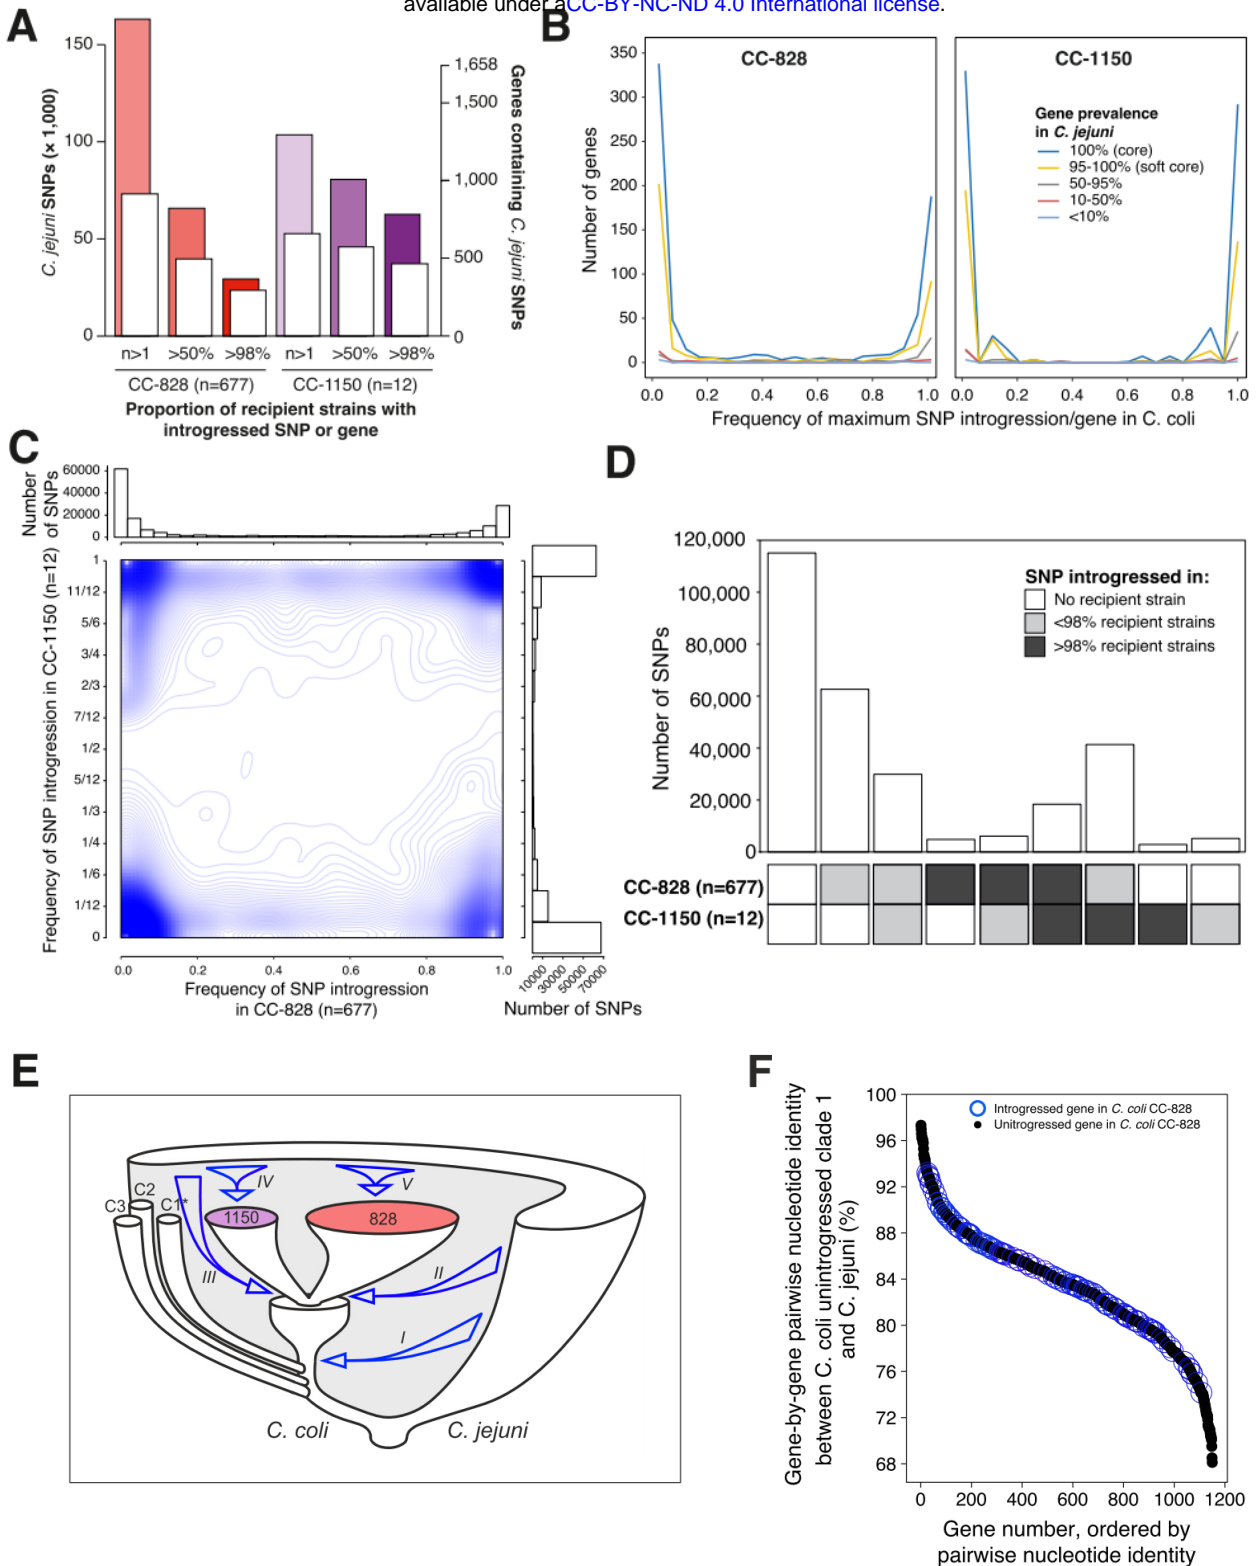

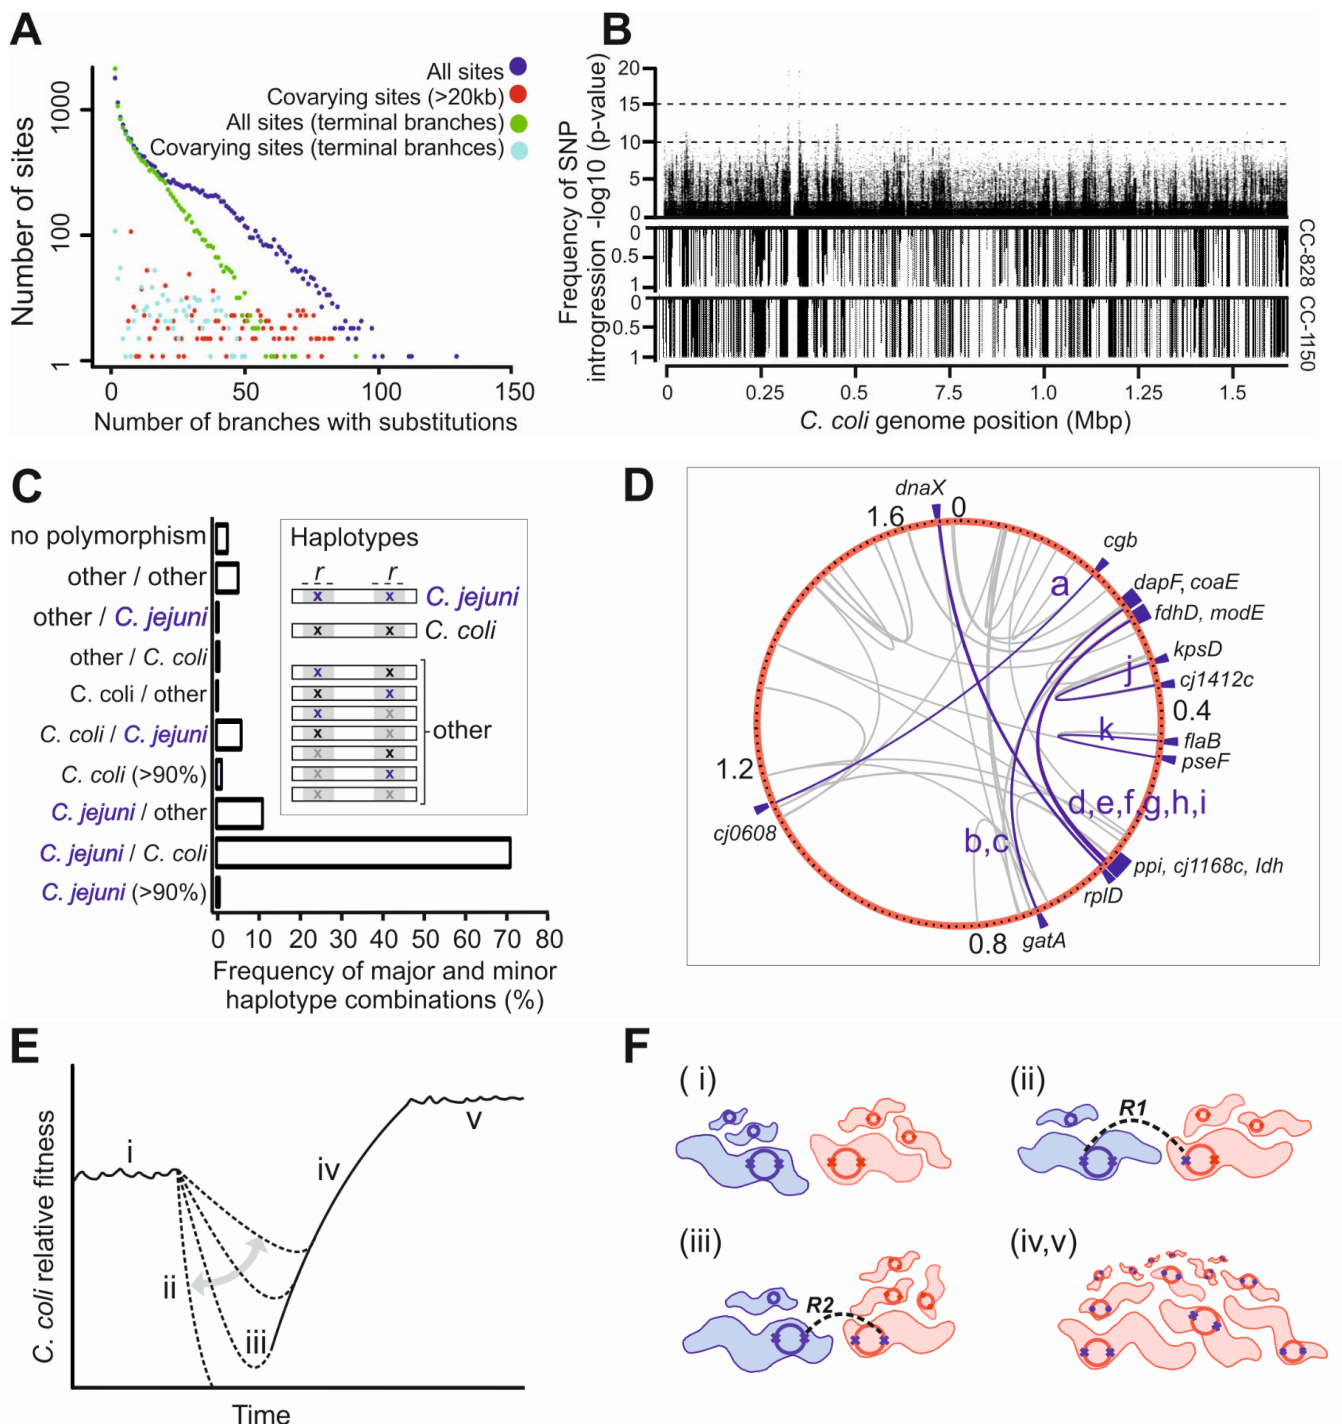



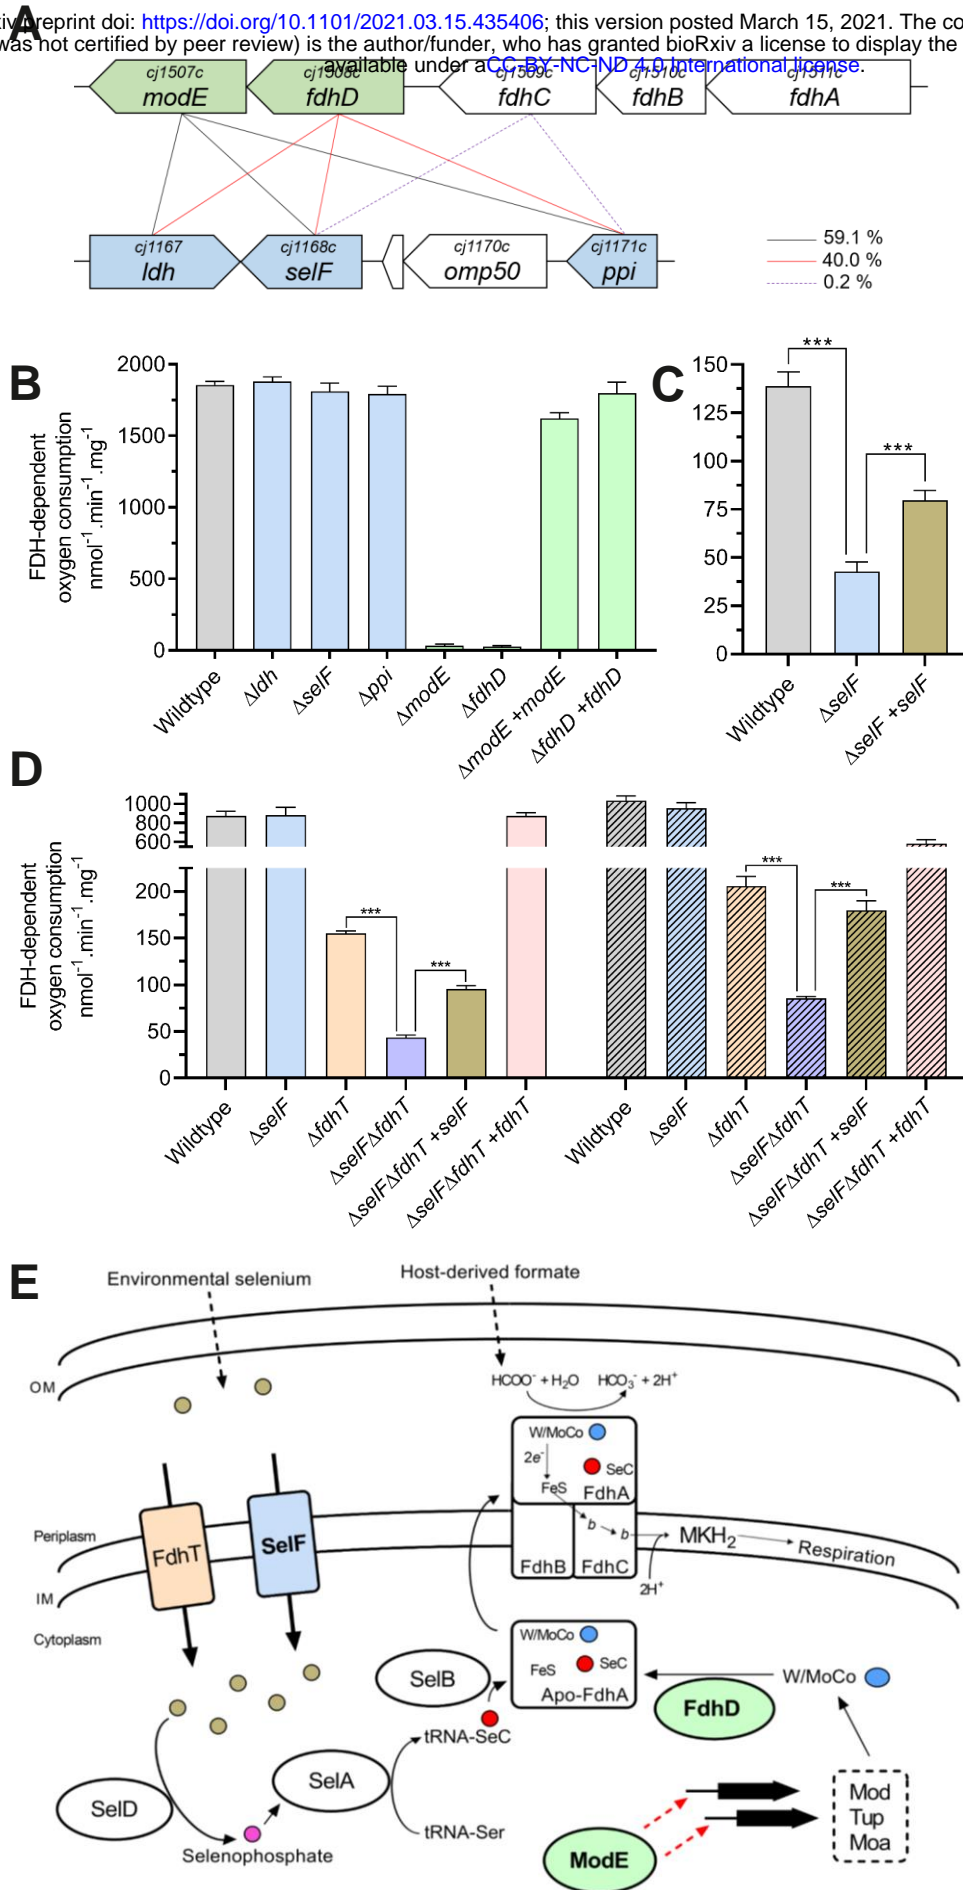

Source: https://www.biorxiv.org/content/10.1101/2021.03.15.435406v1.full.pdf
